# Supplementary material for: Transmission-Blocking Antibodies against Mosquito C-Type Lectins for Dengue Prevention
Source: PLOS journal article supplement (doi:10.1371/journal.ppat.1003931), 2014-02-13
Supplement: S7 (10.1371/journal.ppat.1003931.s007) [file journal.ppat.1003931.s007]

**Table S2. The specificity of the dsRNA-mediated silencing among 9 *mosGCTL* genes.**

| Detection of <i>mosGCTLs</i> mRNA |                |           |            |            |            |            |            |            |            |            |
|-----------------------------------|----------------|-----------|------------|------------|------------|------------|------------|------------|------------|------------|
| dsRNA mediated silencing          |                | mosGCTL-3 | mosGCTL-15 | mosGCTL-19 | mosGCTL-20 | mosGCTL-22 | mosGCTL-23 | mosGCTL-24 | mosGCTL-26 | mosGCTL-32 |
|                                   | mosGCTL-3 RNAi | 0.28**    | 0.61       | 0.80       | 0.75       | 1.00       | 0.68       | 0.93       | 0.63       | 0.77       |
|                                   | mosGCTL-15RNAi | 1.33      | 0.28       | 1.10       | 1.01       | 1.03       | 0.73       | 0.70       | 0.67       | 0.98       |
|                                   | mosGCTL-19RNAi | 0.99      | 0.89       | 0.25       | 1.57       | 0.69       | 0.63       | 0.65       | 0.61       | 0.41***    |
|                                   | mosGCTL-20RNAi | 1.11      | 1.20       | 0.56       | 0.21       | 0.71       | 0.83       | 0.92       | 0.88       | 1.20       |
|                                   | mosGCTL-22RNAi | 0.72      | 0.55       | 0.69       | 1.07       | 0.22       | 0.42       | 0.43       | 0.27       | 0.45       |
|                                   | mosGCTL-23RNAi | 1.04      | 1.00       | 1.49       | 0.28       | 0.34       | 0.15       | 0.30       | 0.33       | 0.49       |
|                                   | mosGCTL-24RNAi | 1.08      | 1.12       | 0.98       | 0.79       | 0.63       | 0.69       | 0.21       | 1.05       | 1.03       |
|                                   | mosGCTL-26RNAi | 0.89      | 0.74       | 0.56       | 0.71       | 0.58       | 0.68       | 0.72       | 0.08       | 0.81       |
|                                   | mosGCTL-32RNAi | 1.09      | 1.33       | 1.71       | 0.97       | 0.75       | 0.77       | 0.71       | 0.95       | 0.23       |

\* The number represents the ratio of the *mosGCTL* mRNA amount between *mosGCTL*-dsRNA and *GFP*-dsRNA treated mosquitoes. The *mosGCTLs* dsRNA were inoculated into mosquitoes respectively. *GFP* dsRNA served as mock control. The mosquitoes were sacrificed at 9 days after dsRNA inoculation. The amount of *mosGCTL* mRNA was determined by qPCR and normalized by *A. aegypti actin*.

\*\* The column in deep gray: Silencing effect by its own dsRNA inoculation.

\*\*\* The column in light gray: Cross-silencing effect with ratio<0.5 (more than 2-fold decrease).
